1       **An experimental test of information use by North American wood**  
2       **ducks (*Aix sponsa*): external habitat cues, not social visual cues,**  
3                       **influence initial nest-site selection**

4  
5                               Elena C. Berg<sup>1</sup> & John M. Eadie<sup>2</sup>

6  
7       <sup>1</sup>*Department of Computer Science, Mathematics, and Environmental Science, American*  
8       *University of Paris, France*

9  
10       <sup>2</sup>*Department of Wildlife, Fish, and Conservation Biology, University of California, Davis,*  
11       *CA, USA*

12  
13       Author for correspondence:

14  
15       Elena C. Berg

16       Email: [eberg@aup.edu](mailto:eberg@aup.edu)

17  
18       Running title: Nest-site selection and information use

19

20 **Abstract**

21 Birds may use a variety of cues to select a nest site, including external information on  
22 habitat structure and nest site characteristics, or they may rely instead on social  
23 information obtained directly or indirectly from the actions of conspecifics. We used an  
24 experimental manipulation to determine the extent to which a California population of  
25 the wood duck (*Aix sponsa*) used social information gleaned from visual cues inside  
26 nest boxes that might indicate the quality or occupancy of that site. Over two nesting  
27 seasons, we manipulated the contents of newly installed boxes to simulate one of three  
28 states: (1) presence of wood duck eggs, indicating current use of a nest site; (2)  
29 presence of down and shell membranes, indicating a previously successful nest; and (3)  
30 control nests with fresh shavings indicating an unused box. In addition, we measured  
31 habitat characteristics of the area surrounding each box to assess the use of external,  
32 non-social information about each nest site. We found no evidence that females laid  
33 eggs preferentially, or that conspecific brood parasitism was more likely to occur, in any  
34 of the treatments. In contrast, nest site use and reproductive traits of wood ducks did  
35 vary with vegetation cover, and orientation and distance of the box from water. Our  
36 results suggest that personal information, not social information, influence initial nest  
37 site selection decisions when females are unfamiliar with a site. Social cues likely  
38 become increasingly important once nest sites develop their own history, and a  
39 population becomes well established.

40

## 41 **Significance Statement**

42 In selecting a nest site, birds may use many types of information, including habitat  
43 characteristics, their own previous breeding experience, or social cues inadvertently  
44 provided by other individuals of the same or different species. We examined information  
45 use in a Californian population of wood ducks by experimentally manipulating the visual  
46 cues within nest boxes and found that females did not use internal box cues to direct  
47 their nesting behaviors, appearing to rely on key habitat characteristics instead. These  
48 results contrast with previous studies of this system, suggesting that females may  
49 change the cues they use depending on their prior experience with a particular area. In  
50 the nest-site selection literature, there appears to be a divergence between research on  
51 passerines versus waterfowl, and we advocate unifying these perspectives.

52

53 **Keywords:** personal and social information use, waterfowl, *Aix sponsa*, nest-site  
54 selection, conspecific brood parasitism

55

## 56 **Declarations**

### 57 *Funding*

58 Financial support for this project was provided by grants and fellowships from the  
59 University of California at Davis (to ECB), an NSF RTG in Animal Behavior (to ECB), a  
60 Sigma-Xi Grant-in-Aid of Research Award (to ECB), NSF IOS 1355208 (to JME),  
61 National Institute of Food and Agriculture (NIFA) WFB-6342-H (to JME), and funds  
62 from the Dennis G. Raveling Endowed Chair (to JME). The Putah Creek Council  
63 provided support for a field assistant, and the California Waterfowl Association donated

64 funds for the wood duck boxes erected for this study. The manuscript was written with  
65 the help of sabbatical support from the American University of Paris (to ECB).

66

#### 67 *Conflicts of interest/Competing interests*

68 The authors declare that they have no conflict of interest.

69

#### 70 *Ethics approval*

71 All of our methods were approved by the UC Davis Institutional Animal Care and Use  
72 Committee (Protocol #15824). Females were caught, banded, measured, and released  
73 under a US Migratory Bird Banding (BBL) Master permit #10562 (to JME). All methods  
74 were observational.

75

#### 76 *Authors' contributions*

77 ECB erected the nest boxes used in this study and collected the field data, with help  
78 from JME and student volunteers. JME conducted the statistical analyses. ECB and  
79 JME designed the study together and contributed equally to the writing of the  
80 manuscript.

81

#### 82 **Acknowledgments**

83 The authors would like to thank all of the students who helped with the field research, in  
84 particular Rick Ziegler and Richard Shaw. We also thank Tom Moore for help  
85 establishing the study site and for providing much feedback. Financial support for this  
86 project was provided by grants and fellowships from the University of California at Davis

87 (to ECB), a National Science Foundation Research Training Grant in Animal Behavior  
88 (to ECB), a Sigma-Xi Grant-in-Aid of Research Award (to ECB), National Science  
89 Foundation Integrative Organismal Systems grant 1355208 (to JME), National Institute  
90 of Food and Agriculture grant WFB-6342-H (to JME), and funds from the Dennis G.  
91 Raveling Endowed Chair (to JME). The Putah Creek Council provided support for a field  
92 assistant, and the California Waterfowl Association donated funds for the wood duck  
93 boxes erected for this study. The manuscript was written with the help of sabbatical  
94 support from the American University of Paris (to ECB).

95

96 **Introduction**

97 Animals use various types of information to make decisions about what to eat, where to  
98 live, and how to find mates or avoid predators. They can rely on “personal” information  
99 gleaned from the physical environment or from their own private experience (i.e., trial  
100 and error), or they can use “social” information, taking advantage of signals or cues  
101 provided by other individuals of the same or different species (Danchin et al. 2004).  
102 Social information can be based on 1) inadvertent cues about another individual’s  
103 performance (typically referred to as “public” information), 2) the location of other  
104 individuals or 3) intentional signals produced by con- or heterospecifics (Danchin et al.  
105 2004). This question of when and how animals use different kinds of information has  
106 inspired a growing number of theoretical studies and reviews (Bonnie and Earley 2007;  
107 Dall et al. 2005; Danchin et al. 2004; Dubois et al. 2012; Evans et al. 2016; Gil et al.  
108 2019; Lee et al. 2016; Rieucou and Giraldeau 2011; Schmidt and Whelan 2010;  
109 Seppänen et al. 2007; Valone 2007), complemented by empirical studies exploring the  
110 impact of social information use on foraging behavior (Coolen et al. 2003; Machovsky-  
111 Capuska et al. 2014; Templeton and Giraldeau 1996), antipredator behavior (Frechette  
112 et al. 2014; Griffin 2004), mate choice (Nordell and Valone 1998), and breeding habitat  
113 selection (Danchin et al. 1998; Pöysä 2006; Vaclav et al. 2011). Evidence of social  
114 information use has been found in a wide array of taxa, including mammals (e.g., Ellard  
115 and Byers 2005; Lewanzik et al. 2019; Toelch et al. 2014), fish (e.g., Coolen et al. 2003;  
116 Elvidge et al. 2016; Webster and Laland 2017), amphibians and reptiles (e.g., Hobel  
117 and Christie 2016; Kar et al. 2017), insects (e.g., Avarguès-Weber et al. 2018; Grüter

118 and Leadbeater 2014), and birds (e.g., Aparicio et al. 2007; Roy et al. 2009; Tolvanen et  
119 al. 2018).

120 The use of personal and social information has been especially well studied in  
121 birds, particularly in the context of nest-site selection (Campobello and Sealy 2011;  
122 Chalfoun and Schmidt 2012; Nocera and Betts 2010 and other contributors to a special  
123 issue of *The Condor*; Szymkowiak 2013). In selecting a nest site, females may use  
124 environmental cues such as food availability or habitat structure (Brown and Brown  
125 1996; Orians and Wittenberger 1991) or nest site visibility (Bellrose and Holm 1994;  
126 Semel and Sherman 1986; Semel and Sherman 1995; Semel et al. 1988).  
127 Environmental cues are often more static or stable than social cues. Features of the  
128 habitat (e.g., physical structure, vegetation, microclimate) are unlikely to change  
129 markedly among breeding attempts and so may provide information that is reliable over  
130 multiple years. However, because success likely depends on additional dynamics  
131 operating at a local or population level (e.g., competition for nest sites, parasite loads,  
132 predation risks), static environmental cues may not always provide reliable predictors of  
133 success.

134 Alternatively, females may rely on information gleaned from other individuals. For  
135 example, information on nest site preferences, use, and reproductive success could be  
136 obtained by following or observing the actions of other conspecifics (Danchin et al.  
137 1998; Pöysä 2006), heterospecifics (Mönkkönen and Forsman 2002; Parejo and Avilés  
138 2007; Seppänen and Forsman 2007; Tolvanen et al. 2018), or both (Samplonius et al.  
139 2017). These inadvertent socially-generated cues are frequently more ephemeral and  
140 may operate on shorter timescales, within one or just a few breeding seasons. Social

141 cues provide immediate information on nest site use or success by other birds, but that  
142 information may not be reliable for future breeding attempts. Hence, while external  
143 habitat cues and social cues both provide useful information – the time scale and  
144 reliability of each source of information may vary. Moreover, the utility of either source of  
145 information will also depend on the history of a given resource. A newly established nest  
146 site, for example, would have little to no history and so nest site selection may be based  
147 more on external habitat cues. Conversely, as nest sites develop their own history of  
148 use and success, social cues might become more informative, albeit requiring on-going  
149 re-assessment and refinement by the user. Accordingly, animals may use different  
150 types of information at different points in the nest site selection process and as  
151 information on the quality of a site accumulates over time.

152         One of the most commonly explored conspecific social cues is evidence of  
153 current or past nest success (Boulinier et al. 2008; Danchin et al. 1998; Doligez et al.  
154 2002; Kearns and Rodewald 2013; Kelly and Schmidt 2017; Parejo et al. 2008; Sergio  
155 and Penteriani 2005; Ward 2005). For example, black-legged kittiwakes (*Rissa*  
156 *tridactyla*) use the reproductive success of their neighbors to decide whether to  
157 emigrate (Danchin et al. 1998); a more recent study of the same species showed that  
158 individuals whose clutches failed were more likely to return to the same breeding habitat  
159 the next year if their neighbors were successful (Boulinier et al. 2008). In collared  
160 flycatchers (*Ficedula albicollis*), immigration and emigration rates declined when  
161 reproductive success was experimentally lowered (Doligez et al. 2002). Kearns and  
162 Rodewald (2013) found that Northern cardinals (*Cardinalis cardinalis*), but not Acadian



163 flycatchers (*Empidonax virescens*), adjusted the height and concealment of their nests  
164 in response to both personal and social information about nest predation.

165 Curiously, two rather distinct research trajectories have developed among  
166 researchers working on different groups of birds in their approach to investigating nest  
167 site selection. In passerines, there has been a strong behavioral ecological orientation,  
168 incorporating ideas on social information use and reliability into habitat selection models  
169 (Ahlering et al. 2010; Ahlering and Faaborg 2006; Andrews et al. 2015; Nocera and  
170 Betts 2010 and references above). Research on waterfowl and other gamebirds, in  
171 contrast, has instead focused more on evaluating external habitat cues of resource  
172 selection, specifically on the physical, environmental and resource variables birds may  
173 be tracking to hone in on appropriate nesting locations (e.g., Clark and Shutler 1999;  
174 Crabtree et al. 1989; Dyson et al. 2019; Gloutney and Clark 1997; Hines and Mitchell  
175 1983 and see review by Eichholz and Elmberg 2014). One explanation for this is that  
176 waterfowl studies have traditionally had a more applied management focus, with an  
177 emphasis on identifying and protecting habitats that are particularly suitable for  
178 waterfowl foraging and breeding. Classic wildlife studies, like those done on many  
179 waterfowl species, have typically measured an array of relevant environmental variables  
180 without necessarily incorporating information on social behavior (but see O'Neil et al.  
181 2014; Pöysä et al. 1998). This is not to ignore the extensive literature on physical  
182 habitat selection by passerines and other non-gamebirds (Jones 2001), but it is striking  
183 that there has been a relative paucity of research on the use of social information in the  
184 wildlife and waterfowl literature (Eichholz and Elmberg 2014; O'Neil et al. 2014; Pöysä  
185 et al. 1998).

186           There is an exception to this trend, specifically for species that exhibit conspecific  
187 brood parasitism (CBP), the laying of eggs in the nests of other females of the same  
188 species. CBP occurs in a wide range of taxa, including insects, fish, and birds  
189 (Andersson 1984; Brockmann 1993; Soler 2017; Yom-Tov 1980; Zink 2000), but is  
190 particularly common among waterfowl (Eadie et al. 1988; Lyon and Eadie 2008;  
191 MacWhirter 1989; Rohwer and Freeman 1989). CBP is unique in that parental and  
192 parasitic tactics coexist in the same population. Curiously, this is one area in the  
193 waterfowl literature where researchers have paid particular attention to the role of social  
194 information, possibly because CBP is inherently a social interaction among females,  
195 and the use of social cues over short time intervals may play an important role in how  
196 parasites choose among possible host nests (reviewed in Pöysä et al. 2014). Studies of  
197 social information use and CBP have been conducted on a number of waterfowl  
198 species, including common goldeneyes (*Bucephala clangula*, Dow and Fredga 1985;  
199 Pöysä 1999; Pöysä 2006), common eiders (*Somateria mollissima*, Fast et al. 2010;  
200 Lusignan et al. 2010), red-breasted mergansers (*Mergus serrator*, Thimot et al. 2020),  
201 and North American wood ducks (*Aix sponsa*, Odell and Eadie 2010; Roy et al. 2009;  
202 Semel and Sherman 1986; Semel and Sherman 1995).

203           In the current study we attempt to bridge the gap between these two approaches  
204 by investigating both external habitat (environmental) as well as social cues underlying  
205 nest-site selection in a California population of the North American wood duck. Previous  
206 research on this species suggests that females may rely on factors intrinsic to the site  
207 itself, preferring nest boxes in highly visible areas (Bellrose and Holm 1994; Roy-  
208 Nielsen et al. 2006; Semel and Sherman 1986; Semel and Sherman 1995; Semel et al.

209 1988); but see (Jansen and Bollinger 1998). Separate studies have suggested that  
210 females use social cues to assess the quality of individual nest-sites, laying  
211 preferentially in previously successful nests (Hepp and Kennamer 1992); in nests that  
212 were previously used but not necessarily successful (Roy et al. 2009); in active nests  
213 containing eggs (Clawson et al. 1979; Wilson 1993); in active nests with low numbers of  
214 eggs (Odell and Eadie 2010); or in nest boxes around which other ducks have gathered  
215 (Heusmann et al. 1980; Semel and Sherman 1986; Semel and Sherman 1995; Wilson  
216 1993). In wood ducks, the main cause of nest failure is nest desertion, not predation,  
217 which might explain why females seem to be honing in less on previous nest success  
218 compared to the highly depredated nests of common goldeneyes (Roy et al. 2009).

219       To tease apart which – if any - environmental and social cues females (nesting or  
220 parasitic) may be using, we conducted an experimental field study in which we  
221 manipulated the internal social cues in newly-erected nest boxes, while concurrently  
222 collecting extensive habitat data at each nest site. We erected brand new boxes to  
223 control for previous nest use and other historical factors that might influencing nesting  
224 behavior (Pöysä et al. 2014). Wood ducks are particularly well-suited to this kind of  
225 experimental study because they readily use nest boxes and exhibit generally high  
226 levels of parasitic behavior. Over the course of two field seasons, we experimentally  
227 manipulated nest contents to mimic one of three different conditions: an unused nest  
228 (control, with wood shavings); an active nest during the laying stage (with eggs sitting  
229 on top of the shavings); or a previously successful nest (with eggshells and down). This  
230 allowed us to test whether females are using evidence of previous/current box use to  
231 direct their laying strategies, and whether these tactics differ among nesting versus

232 parasitic females. At each nest box site, we also collected data on an array of  
233 environmental variables, including box visibility and orientation, proximity to water, and  
234 distance between boxes.

235 If females are preferentially selecting previously successful nest sites (i.e., “safe”  
236 sites with lower predation risk, Pöysä 1999; Pöysä 2006), then we would expect them to  
237 favor the nests with down and eggshells in them. If they are using current box use as a  
238 guide (Clawson et al. 1979; Odell and Eadie 2010; Wilson 1993), then boxes with eggs  
239 already in them should be favored – particularly by parasitic (non-incubating) females.  
240 Conversely, if females avoid nests with evidence of current occupancy, treatment boxes  
241 with eggs should be avoided. Alternatively, it is possible that females pay little or no  
242 attention to internal box cues, relying instead on key habitat characteristics that might  
243 provide more reliable long-term (static) information – at least for “new” nest sites such  
244 as these. A final possibility is that females are using some combination of personal and  
245 social information.

246

## 247 **Methods**

### 248 *Study Area*

249 Our study was conducted within the Putah Creek Reserve in Davis, California during  
250 March-July of 1998 and 1999. New nest boxes were erected along lower Putah Creek,  
251 located at the southern end of the Putah-Cache Creek watershed. This natural  
252 waterway winds through both urban and agricultural landscapes and is an important  
253 resource for both farmers and wildlife. Our study site was divided into two sections, 1)  
254 “Putah Creek” (PC), a 5.52 km (63.2 ha) section of the creek where a total of 37 boxes

255 were erected 41-469 m apart (mean = 157 m; 0.62 boxes/ha), and 2) “Russell Ranch”  
256 (RR), a 1.79 km stretch (24.75 ha) located approximately 6 km downstream from PC  
257 where we erected 12 boxes at similar density, one box every 87-207 m (mean = 130 m,  
258 0.93 boxes/ha). Along PC, 34 of the 37 boxes were erected just prior to the 1998  
259 nesting season; 4 were erected in 1997 after the nesting season but were not set up for  
260 use until 1998. At RR, 7 of the boxes were erected in 1997 and 5 were erected at the  
261 end of the nesting season in 1998, but none of the boxes were set up for use until just  
262 prior to the 1999 nesting season. Nest box density at both sites was far lower than that  
263 reported in many other studies of wood ducks (e.g., Semel and Sherman 1995), and  
264 closely approximated natural cavity densities – e.g., 0.68 cavities/ha (Soulliere 1988),  
265 4.0 cavities/ha, range 0.8–15.3 cavities/ha (Gilmer et al. 1978). Boxes were placed  
266 between 1.5 and 5 m (mean = 3 m) above the ground primarily on oak (*Quercus*),  
267 cottonwood (*Populus*), walnut (*Juglans*), and eucalyptus (*Eucalyptus*) trees located  
268 between 2 and 60 m (mean = 16 m) from the bank of the creek.

269

#### 270 *Experimental Manipulation of Internal Box Environment*

271 The visual cues influencing female nest-site selection were analyzed experimentally  
272 using the responses of females to various nesting conditions, simulated by different  
273 combinations of wood duck eggs, down, and eggshells. The responses of breeding  
274 females to nests with eggs in them (representing active or recently abandoned nests),  
275 nests with down and eggshells in them (representing either successfully hatched or  
276 predated nests), and empty (unused) nests was recorded to see which nest-site

277 conditions most attract females. During each breeding season, we randomly assigned  
278 each nest box to equal numbers of the three treatments, defined as follows:

- 279 1. Control: Our control treatment consisted of a 10-cm layer of wood shavings. This is  
280 the standard way of prepping a nest box for use by wood duck females.
- 281 2. Eggs: To simulate an active or recently abandoned nest, we placed three eggs on  
282 top of approximately 10 cm of wood shavings. We used either unhatched wood  
283 duck eggs, wood duck eggs from a recently-abandoned nest, or when no fresh duck  
284 eggs were available, unfertilized chicken eggs. Chicken eggs are similar in color,  
285 size, and shape to wood duck eggs and thus closely approximated natural  
286 conditions.
- 287 3. Down and eggshells: Nesting wood ducks produce a layer of down with which they  
288 cover eggs during forays off the nest. When eggs hatch, pieces of shell and  
289 membranes are consistently left behind with the down. To simulate a successfully  
290 hatched nest, we placed a 3-cm layer of wood duck down interspersed with  
291 eggshell membranes and shell fragments onto wood shavings. The down and  
292 membranes were collected from old nests that had either produced ducklings or  
293 were predated after hatch.

294 In 1998, we worked only at the PC site and conducted one set of experiments,  
295 establishing treatment nests in newly-erected nest boxes between March 15 and April  
296 24. In 1999, we included 12 boxes at the RR site and conducted two sets of replicate  
297 experiments at each site. From March 3 to March 17 before nesting began, we  
298 randomly assigned each nest box to equal numbers of the three treatments. From May  
299 5 to May 24 we repeated the experiment and reset all boxes that had not been used

300 and re-randomized treatments. We realize that females might have responded  
301 differently to boxes depending on their familiarity with them. For this reason, we  
302 conducted different analyses depending on each of these sets of treatments, as  
303 described in “Statistical Analyses” below.

304

### 305 *Nest Monitoring and Identity of Reproductive Tactics*

306 Nest checks every other day as well as close monitoring of females determined which  
307 nest boxes were being selected by which females and whether or not the eggs laid in  
308 these boxes were subsequently incubated. During each nest check, the box was  
309 plugged to prevent the female, if present, from flushing from the nest. This minimized  
310 the danger of egg damage and allowed us to identify (and individually mark, if we had  
311 not already done so) the nesting female. We recorded the following nest stages:  
312 ‘playing house,’ (the wood shavings were disturbed, or there was a depression in the  
313 shavings, but no eggs were present) ‘laying,’ (one or more eggs were present but were  
314 at ambient temperature), and ‘incubation’ (if a female was present and eggs were warm,  
315 or if a female was absent but eggs were warm and covered with down). In active nests,  
316 we used a fine-tipped permanent marker to number the end of each egg.

317 We established the possible presence of parasitic females using a combination  
318 of techniques, including nest-trapping and banding of females and regular monitoring of  
319 all active nests. A nest was considered parasitized if any of three criteria were met:  
320 more than one egg was laid per day, the total number of eggs in a clutch exceeded 13,  
321 or eggs were laid after the onset of incubation (Eadie et al. 2010). These criteria are

322 well-established proxies for nest parasitism (Brown 1984; Eadie et al. 2010; Gibbons  
323 1986; Lyon and Eadie 2017; Yom-Tov 1980).

324

### 325 *External Environmental Characteristics*

326 To examine the alternative hypothesis that females select and use nest sites based on  
327 external environmental characteristics instead of, or in addition to, internal box cues, we  
328 collected data on an extensive series of habitat features, incorporating 20 variables  
329 related to: (i) vegetation cover at the nest site, (ii) tree species and stand composition,  
330 (iii) proximity to other trees, nest boxes or water, (iv) orientation and height of the box,  
331 and (v) characteristics of the shoreline. These variables are summarized in Table 1 with  
332 abbreviations referred to in analyses.

333 We attempted to establish identical sets of experimental nest boxes strategically  
334 placed in two different habitat types, an “open” habitat in which the nest boxes are  
335 highly visible, and a “closed” habitat in which the boxes are well obscured by vegetation.  
336 This distinction between habitat types is useful because it can help determine whether  
337 females are basing their selection of nest site and their subsequent laying strategy  
338 solely on the quality of nest boxes they encounter, on their location, or on both. Some  
339 nests were occupied by other wildlife and some of the experimental treatments were  
340 disturbed (e.g. eggs broken in nest) so that sample sizes varied slightly among  
341 treatment and years.

342



343 *Statistical Analyses*

344 Our analyses were dependent on which sets of boxes were included. Some boxes were  
345 used by other wildlife and so became unavailable (Table 2). We excluded those nests  
346 from all analyses. Further, because we used the same nest boxes erected in 1998 for  
347 experiments in 1999, a small number of boxes that were used in 1998 had previous  
348 history, creating heterogeneity in our sample. In our final analysis we excluded those  
349 nest boxes from the 1999 sample, using only the data from the first nests in 1998. Some  
350 nest sites were also used more than once by wood ducks in a given year. Again, to  
351 ensure that birds were responding only to our experimental treatment and not to  
352 additional information from the current nesting season, we analyzed only the first  
353 attempts for each box. Our goal was to ensure that, at the start of each experiment,  
354 every box had no prior history. Finally, our second replicate set of experiments in May  
355 1999 yielded few additional nests and most boxes were unused (due to the time of the  
356 season). We therefore excluded the second replicate because it confounds the time of  
357 season when the treatments were initiated and simply adds large numbers of unused  
358 boxes that dominate the sample. Our very conservative approach has the limitation that  
359 it reduces sample size, but it ensures that we are evaluating the response of birds to the  
360 same sets of cues. Where appropriate, we note the patterns found when we relax our  
361 criteria; the results remained unchanged.

362 We used generalized linear models (GLMs) throughout (JMP 2018). Our first set  
363 of analyses focused on nest use as influenced by our experimental treatments; given  
364 strong year effects we include both treatment and year in all models. We examined  
365 several response variables; we first considered Use/No Use of the nest box as indicated

366 by the presence of eggs and/or an incubating female. For sites that were used, we then  
367 examined the Number of Eggs Laid, Number of Eggs Hatching, and Date First Egg laid  
368 (Julian). Use/No Use was a binomial response variable, and we examined the effects of  
369 the experimental treatments using a GLM with a binomial distribution and logit link  
370 function. Number of Eggs Laid, Number of Eggs Hatched, and Date of First Egg Laid  
371 were treated as count data, and we examined the effects of the experimental treatments  
372 using a GLM with a Poisson distribution and a log link function. GLMs and Poisson  
373 models are prone to overdispersion and without correcting can give erroneous results  
374 (JMP 2018). Accordingly, for each analysis we included an overdispersion correction  
375 parameter (Pearson Chi-square deviance divided by the degrees of freedom (DF) for  
376 the full sample in the model). With overdispersion, a correction will be more robust and  
377 possibly more conservative. We employed the Firth bias-adjusted method to fit the  
378 model (Firth 1993).

379 Our second set of analyses examined a number of external habitat and nest  
380 characteristics that might provide an alternative source of information for breeding  
381 females. We initially considered 20 external habitat and nest variables (Table 1). A  
382 principal components analysis did not help to reduce these to a simple interpretable set  
383 of habitat dimensions, and so we retained the original variables. As in the first set of  
384 analyses, we examined several response variables, first considering Use/No Use of the  
385 nest site; for sites that were used, we then examined the effect of habitat characteristics  
386 on the Number of Eggs Laid, Number of Eggs Hatching, and Date First Egg laid  
387 (Julian). To explore the potential influence of these variables, we initially conducted  
388 simple bivariate analysis to identify a smaller subset of external characteristics that

389 might influence each response variable, and we conducted exploratory stepwise  
390 selection methods (forward selection using minimum AICc as guiding rule). From these  
391 analyses, we focused on the subset of habitat variables that appeared to have some  
392 influence on each response variable. We conducted GLMs as described above, fitting  
393 multiple models with different combinations of habitat variables. We also contrasted  
394 each model with a similar model that included experimental treatment as an additional  
395 factor. Although many of these models were highly significant in a statistical sense (P-  
396 values  $\ll 0.01$ ) we instead ranked models used a model selection approach based on  
397 minimum values of AIC<sub>c</sub> (Akaike Information Criterion corrected for small sample size;  
398 Burnham and Anderson 2002). We emphasize that the goal of these analyses was *not*  
399 to fit a predictive model, nor even to determine which habitat variables might be best  
400 predictive of wood duck nest use. Rather, we were most interested in determining: (1)  
401 whether any subset of external variables had utility in evaluating wood duck use (do  
402 external cues matter?) and more importantly, (2) whether internal nest cue treatments  
403 provided additional or better explanatory power.

404

## 405 **Results**

406 A total of 34 treatments was established in 1998, and 47 treatments in 1999 (Table 2).  
407 However, eight boxes in 1999 had been used by wood ducks in the previous year or in  
408 a previous attempt in 1999 and were thus excluded from the final analysis. The second  
409 replicate set of treatments in boxes in late May 1999 (N = 32) was also excluded to  
410 avoid confounding date and lack of use late in the season (see Methods). Sample sizes

411 differed slightly between years and treatments due to use or interference by other  
412 wildlife (Table 2).

413         Manipulation of the internal box environment through the experimental addition of  
414 either eggs, egg shells and down, or wood shavings had little effect on box use by wood  
415 duck females. Over the 1998 and 1999 breeding seasons, females nested in 20 of the  
416 81 boxes that were included in the experiment (Table 2). After excluding boxes used  
417 previously by wood ducks and those used by other wildlife, 56 Treatment boxes were  
418 available for analysis (22 Control, 17 Down, 17 Egg treatments). We found no effect of  
419 Treatment on Nest Box Use (Likelihood ratio  $X^2 = 2.75$ ,  $P = 0.25$ ; Table 3). Contrary to  
420 our predictions, there was a trend for Control boxes to be used more (50%) compared  
421 to either Down (29%) or Egg treatments (24%; Figure 1). This pattern did not change  
422 when we relaxed our criteria and included boxes that had been previously used (Control  
423 50% of 24 boxes used, Down 38% of 21 boxes used, and Egg 32% of 19 boxes used).  
424 Year had a strong influence on Nest Box Use (Likelihood ratio  $X^2 = 9.95$ ,  $P = 0.002$ ;  
425 Table 3), largely because nest box use was low in 1998 compared to 1999 (Table 2).

426         We also found no influence of treatment on Number of Eggs Laid or Julian Date  
427 of First Egg (Table 3) although there was a significant effect of treatment on the Number  
428 of Eggs Hatching (Likelihood ratio  $X^2 = 6.17$ ,  $P = 0.05$ ; Table 3). Fewer eggs hatched in  
429 the Egg treatment (Figure 2). The Julian date of First Egg was influenced by year;  
430 nesting was considerably earlier in 1999.

431         Our analysis of a comprehensive set of external habitat cues suggest that a small  
432 number of characteristics influence nest use and reproductive success of wood ducks  
433 (Table 4). Notably, nest box Use was influenced by nest box visibility, presence of trees

434 in front of the box, and orientation. Both the Number of Eggs Laid and the Number of  
435 Eggs Hatching were influenced by the direction and distance to water (Table 4). Several  
436 of these patterns were highly significant ( $P < 0.01$ ), indicating that external habitat  
437 characteristics influence nest site use and investment in newly erected nest boxes.

438 A central question for our study was how wood ducks might make use of two  
439 different kinds of information: external habitat cues versus social cues. To fully contrast  
440 these alternatives, we considered the habitat models identified above (Table 4) and ran  
441 the models with the same subset of habitat variables but also including the effects of  
442 experimental treatment to allow both sets of 'cues' to compete for the data. These  
443 analyses further suggest that wood ducks do not make use of social cues but instead  
444 rely on a few habitat characteristics. For three of the four reproductive measures  
445 considered, only habitat variables were included in the top models ( $\Delta Aic_c > 3$  or greater,  
446 Table 4). The one exception was for the Number of Eggs Laid, for which inclusion of  
447 treatment effects in addition to direction to water comprised the top model ( $\Delta Aic_c = 7.4$ ,  
448 Table 4).

449 Finally, we found no evidence that any of the treatment nests were more likely to be  
450 parasitized. Considering all treatment nests (including those previously used) there was  
451 evidence of only 6 nests being parasitized as indicated by observations of  $> 1$  female on  
452 the nest, clutch size sizes  $> 13$  eggs, or eggs laid after incubation. Of these, 2  
453 parasitized nests occurred in each treatment.

454

455

456

457 **Discussion**

458 Over the course of our two-year field experiment, we found no evidence that wood duck  
459 females used social cues about the internal state of the nest box at the beginning of the  
460 breeding season, at least not when boxes were brand new to an area. This result was  
461 somewhat surprising given that a recent study of long-term patterns of nest use by  
462 wood ducks on our study area (including Putah Creek although not during the years of  
463 the current study) found that females were more likely to use nest sites that had been  
464 previously used by other females (Roy et al. 2009). Other studies likewise suggest that  
465 wood ducks use social cues to assess the quality of individual nest-sites, such as  
466 evidence of previous success (Hepp and Kennamer 1992); nests containing eggs  
467 (Clawson et al. 1979; Odell and Eadie 2010; Wilson 1993); or nest boxes around which  
468 other ducks have gathered (Heusmann et al. 1980; Semel and Sherman 1986; Semel  
469 and Sherman 1995; Wilson 1993). In our previous study (Roy et al. 2009), we found no  
470 evidence that previous success influenced future nest box use, and so we hypothesized  
471 that females were cueing in to activities or signs of use by other females. If this were the  
472 case, and females were using internal box cues rather than actual knowledge of box  
473 use to guide their decisions, there should have been no difference in box use between  
474 egg treatments (representing active nest) and shells-and-down treatments (representing  
475 a previously successful nest), but significantly more use of those two treatments  
476 combined than of unused boxes (those with wood shavings only). In fact, although we  
477 did find that females were just as likely to use boxes with eggs and shells-and-down, if  
478 anything they showed a slight preference for empty “unused” nests with just shavings

479 inside. Our results suggest that internal cues do not attract females to a nest-site and  
480 may even cause females to avoid these sites.

481         Although females were not using social cues about previous or current box use  
482 to choose a nest-site, they did seem to be paying attention to specific habitat  
483 characteristics. They were significantly more likely to nest in boxes that were located in  
484 more open visible locations, with few trees in front of the entrance and oriented towards  
485 and closer to water (Table 4). None of these patterns are unexpected and suggest that,  
486 for the females in our experiment at least, simply finding a nest site may be the central  
487 challenge and external habitat features might be most influential.

488         In stark contrast to our study, evidence for social information use has been  
489 documented in a number of other waterfowl species, particularly in the context of  
490 conspecific brood parasitism. For example, in cavity-nesting common goldeneyes,  
491 parasitic females appear to be using predation risk as a cue, preferentially selecting  
492 nest boxes that have not been depredated the previous year (Pöysä 1999; Pöysä 2006;  
493 Pöysä et al. 2010; Pöysä and Paasivaara 2015). In contrast, a study of red-breasted  
494 mergansers in Canada (Thimot et al. 2020) found that females were not preferentially  
495 selecting “safe” nest sites, likely because egg predation rates were low in this  
496 population. Rather, the presence of conspecifics seemed to be a cue: artificial nests  
497 with no host attracted fewer brood parasites (Thimot et al. 2020). Among common  
498 eiders, also a ground-nester, nest visibility impacts parasitism rates more than nest site  
499 safety (Lusignan et al. 2010). Another experimental study of eiders examined the  
500 specific cues females might use, indicating that they are more likely to lay in nests that  
501 had nest materials (down) in them – indicating previous nest success (Fast et al. 2010).

502 Finally, mallards (*Anas platyrhynchos*, Pöysä et al. 1998) and lesser scaup (*Aythya*  
503 *affinis*, O'Neil et al. 2014) apparently use social cues such as conspecific density and  
504 proximity to previously successful nesting habitats in selection of breeding and nesting  
505 sites.

506 The question thus remains: why didn't wood ducks in our study use social cues  
507 to guide their nesting choices, despite evidence from other years, populations and  
508 species suggesting that such social cues may be informative? We suggest several  
509 possibilities. *First, it may be that our experimental design and/or sample sizes were*  
510 *insufficient to detect patterns that might exist.* Although we erected a large number of  
511 nest boxes and established 81 possible treatment nests over two years, the final sample  
512 size was dictated by how the birds responded. As expected, there was little use in the  
513 first year but considerably more in the second (accounting for the strong year effect in  
514 nest box use; Table 3). Moreover, by using brand new boxes, our goal was to eliminate  
515 any previous history associated with each box and so, by design, we knew it would take  
516 time for birds to discover and use our nest boxes. Indeed, it was this very process of  
517 initial nest site selection that we wished to explore to determine how external habitat  
518 cues relative to internal visual social cues might influence nest site selection decisions  
519 by new females. Further, we used very conservative criteria for inclusion in our  
520 analyses, removing any site that was used in the first year (even though it was a new  
521 box that year) from analysis in the second year to ensure that previous history would not  
522 confound our analyses. Nonetheless, even when we relaxed these strict criteria, the  
523 same patterns remained – females did not disproportionately use nests with evidence of  
524 prior use. In fact, if anything, the trend was in the opposite direction regardless of which



525 boxes were included – control boxes were more likely to be used, albeit not significantly  
526 (Figure 1), and huge sample sizes and a strong shift in patterns of nest site use would  
527 be required to alter the results. Finally, despite the more restricted samples sizes when  
528 we applied our conservative criteria, we were still able to detect statistically significant  
529 differences when considering habitat variables (Table 4). We conclude that  
530 experimental design or restricted sample sizes cannot account for the lack of use of  
531 visual social cues by wood ducks in our study; the patterns appear to be robust.

532 *A second possibility is that internal box cues simply are not used by these wood*  
533 *ducks to assess nest quality, at least during a female's first nest attempt of the season.*

534 If cavities are a rare commodity in nature, simply finding a nest that is usable may be  
535 the top priority. Alternatively, the lack of attention to internal cues may have more to do  
536 with when and how females prospect for nests. Common goldeneyes, which do appear  
537 to use box cues (Pöysä 2006), prospect for nests at the end of the breeding season  
538 (Eadie and Gauthier 1985; Eadie et al. 1995), when evidence of recent nesting activity  
539 is presumably still fresh. In contrast, wood ducks prospect for nests in the spring  
540 (Bellrose and Holm 1994; Dixon 1924; Hepp and Bellrose 1995). If the timing of nest  
541 searching is key, and given that wood duck females do not regularly encounter  
542 evidence of previous nesting activity in the spring, selection might not have acted on  
543 females to recognize or respond to internal box cues. Also, female wood ducks in  
544 general may be less selective than goldeneyes in part because of the relatively low  
545 rates of nest predation in wood ducks (discussed in Roy et al. 2009), and/or the speed  
546 with which wood ducks reach reproductive maturity. Female wood ducks reproduce at  
547 one year of age (Bellrose and Holm 1994), whereas goldeneyes exhibit deferred

548 maturity and typically do not breed until they are two years of age or older, increasing  
549 the opportunity for nest exploration and information use (Eadie and Gauthier 1985;  
550 Eadie et al. 1995). However, this would not explain why other populations of wood  
551 ducks (Clawson et al. 1979; Hepp and Kennamer 1992; Wilson 1993), and even the  
552 same population of wood ducks (Odell and Eadie 2010; Roy et al. 2009) do seem to be  
553 paying attention to box cues such as the presence of eggs or down.

554 *A third possibility is that female wood ducks do rely on social cues, but pay more*  
555 *attention to the presence or activity of other wood duck females.* Betts et al. (2008) refer  
556 to such cues as 'location cues' indicated by the presence or position of other individuals,  
557 in contrast to 'public information' indicated by the success or performance of other  
558 individuals at the site (Danchin et al. 2004; Valone 1989). For example, a number of  
559 studies of other wood duck populations have suggested that females may be using cues  
560 such as the presence of females at the nest (Heusmann et al. 1980; Semel and  
561 Sherman 1986; Semel and Sherman 1995; Wilson 1993). When Wilson (1993) placed  
562 decoys of females near nest boxes, brood parasitism rates at those nests increased.  
563 This decoy effect has also been found in a number of other non-waterfowl bird species.  
564 For example, in obligate brood parasitic species such as cuckoos, simply placing  
565 experimental parasitic eggs in host nests did not elicit the maximum response by the  
566 host; the presence of cuckoo females nearby or at the nest (or a taxidermic mount)  
567 significantly increased rejection rates of experimental eggs (Davies and Brooke 1988;  
568 Langmore et al. 2009; Moksnes et al. 1993). This suggests that physical cues such as  
569 the presence of eggs alone may be insufficient to elicit a behavioral response; it may  
570 not be evidence of use, but rather visual confirmation of active use that matters. More

571 recent data for our population of wood ducks also points to the strong influence of social  
572 information use and conspecific activity. For the past six years we have used Passive  
573 Integrated Transponders (PIT tags) and radio frequency identification detection (RFID)  
574 readers on every nest box on over 200 boxes at four study sites and we have PIT-  
575 tagged over 500 females. These data have revealed surprising and remarkable  
576 evidence that females prospect for nests in groups, visit a large number of nest sites  
577 before breeding, and that different sites – even close by – attract very different numbers  
578 of females, suggesting that conspecific cueing and information use may yet play a  
579 significant role in nest site selection processes by wood ducks (JME and colleagues,  
580 unpublished data).

581 *A final intriguing possibility is that females use different kinds of information,*  
582 *including both social and environmental cues, but their relative use of these cues varies*  
583 *over space and time and may be sequentially applied.* Our specific findings (use of  
584 habitat cues, not internal box cues) could be explained by the fact that our nest boxes  
585 were new. In the absence of information on past history of the boxes, females might  
586 instead utilize external habitat characteristics as the best initial estimate of the quality of  
587 the nest site. The challenge for a newly breeding female is simply to find a relatively  
588 rare but suitable nest site, and habitat cues would be available and perhaps more  
589 predictable than social cues. A shift to reliance on social cues may come only after  
590 more information about a site is acquired and the site has developed its own history of  
591 use and success. External habitat cues, over time, may not adequately predict local  
592 dynamics such as the influence of local densities of competitors (conspecifics and other  
593 species), predators, or the buildup of ectoparasite loads of lice, fleas, or mites in a nest

594 box. At a new breeding site, such as the ones we established in 1998-1999, females  
595 may first need to gain familiarity with the “real estate” in the neighborhood, before  
596 shifting their attention to the activities and success of their neighbors. As nest sites  
597 develop a history, more refined assessments of nest site quality are possible, and it is  
598 here when social cues may be most useful. Thus, it is not so much a question of *do*  
599 birds use *either* external personal (habitat cues) *or* social information cues, as often  
600 posed, but rather *when* and under what circumstances might either or both types of  
601 cues be useful. This could also account for the observation that different studies, even  
602 on the same species such as wood ducks, yield different results regarding information  
603 use (see above). With over 20 years of data on this population, and six years of PIT tag  
604 and RFID data, we should be able to address this possible shift in focus in future  
605 studies.

606 We also found no evidence that parasitic and parental females differed in box  
607 use, although the frequency of parasitism was low during the two years of our study.  
608 This again may be a consequence of the early stage of our study, such that local  
609 populations had not yet increased and competition for nest sites was low; conspecific  
610 parasitism may be less frequent under these conditions (see Semel and Sherman 1986;  
611 Semel and Sherman 1995; Semel et al. 1988). There is evidence that CBP in wood  
612 ducks is density-dependent (Clawson et al. 1979; Heusmann et al. 1980; Semel and  
613 Sherman 1986) and so it would not be unexpected that parasitic females might rely  
614 more on the use of social cues to select host nests in larger established populations as  
615 found in common goldeneyes (Dow and Fredga 1985; Pöysä 1999; Pöysä 2006),  
616 common eiders (Fast et al. 2010; Lusignan et al. 2010), and red-breasted mergansers

617 (Thimot et al. 2020). Interestingly, the only effect of our experimental treatments, when  
618 habitat features were controlled, was on the number of eggs laid and a trend towards  
619 fewer eggs hatching (Table 4, Figure 2). Perhaps nests with eggs attracted parasitic  
620 females to lay a few eggs in those nests, and nests closer and more directly facing the  
621 water might be more accessible. In any case, we did find that wood ducks readily used  
622 nest sites already containing eggs, suggesting that they do not avoid sites even where  
623 there is evidence of current occupancy. Odell and Eadie (2010) found a similar pattern  
624 in a separate experiment with wood ducks, suggesting that abandoned eggs could  
625 subsequently be included in a clutch of a new female who then incubates the nest.  
626 Whether this represents accidental “parasitism” or more covertly, a form of “pre-emptive  
627 parasitism” is an intriguing question and may be a factor contributing to the high  
628 frequency of conspecific brood parasitism observed in this species.

629         Our results have management and conservation implications and offer some  
630 insight on the divergent trajectories that appear to characterize nest site selection  
631 studies by gamebird vs. non-gamebird bird ecologists. A large number of studies have  
632 now recognized the importance of both social and personal information use in nest site  
633 selection by birds (Ahlering et al. 2010; Ahlering and Faaborg 2006; Betts et al. 2008;  
634 Campobello and Sealy 2011; Chalfoun and Schmidt 2012; Coulton et al. 2011; Nocera  
635 and Betts 2010; Szymkowiak 2013; Ward et al. 2010). However, studies of waterfowl  
636 have focused more on habitat characteristics affecting nesting behaviors, while studies  
637 of passerines tend to focus more on the importance of social information (see also  
638 Eichholz and Elmberg 2014; O’Neil et al. 2014). Until now, the data on waterfowl have  
639 not been deeply integrated into the broader literature on public information use in other

640 birds, but we advocate that both research realms would benefit by more cross-  
641 pollination (see O'Neil et al. 2014 for a similar perspective). The way different species  
642 and populations balance the use of personal versus social information undoubtedly  
643 varies, not only among species (the focus of much current literature), but also over  
644 different temporal and spatial scales. We suggest that the temporal scale of information  
645 use, in particular, has not been widely investigated – the types of cues used for initial  
646 nest site discovery might be very different from those used to refine or adjust nest  
647 selection decisions. Perhaps even more importantly, in light of both rapidly changing  
648 climates and habitats, and huge investments in habitat conservation, the pace at which  
649 each type of information varies could be critical (e.g., habitat structure is likely to change  
650 gradually whereas social cues related to reproductive success or performance could  
651 change drastically within a single nesting season; Betts et al. 2008). Wildlife biologists  
652 working to create or restore high quality nest site habitat may experience limited  
653 success if social cues are more important in the early stages of nest site discovery and  
654 attraction (Ahlering et al. 2010; Ahlering and Faaborg 2006; Nocera and Betts 2010;  
655 Ward et al. 2010). Conversely, providing evidence of social cues to attract birds to new  
656 habitats when the underlying habitat conditions are inadequate or deteriorating could  
657 attract birds into an ecological trap (Schlaepfer et al. 2002) unless birds use external  
658 habitat cues to avoid those locations initially. A deeper understanding of how multiple  
659 cues and sources of information are integrated throughout an individual's lifetime and at  
660 critical life history junctures may have valuable conservation applications.

661

662 **Table 1** List of habitat variables measured at each nest box for experimental nests

| <b>Abbreviation</b>  | <b>Description</b>                                                                                                                                    |
|----------------------|-------------------------------------------------------------------------------------------------------------------------------------------------------|
| <b>Height</b>        | Nest box height (m)                                                                                                                                   |
| <b>Dist Nest Box</b> | Distance to nearest nest box (m)                                                                                                                      |
| <b>Comp Dir</b>      | Compass orientation of entrance (°)                                                                                                                   |
| <b>Dir Water</b>     | Compass orientation toward water from box entrance (°)                                                                                                |
| <b>Dist Water</b>    | Distance to water from box entrance (m)                                                                                                               |
| <b>% Cov Grd</b>     | % Vegetation cover at ground - base of nest (0-100%)                                                                                                  |
| <b>% Cov E</b>       | % Vegetation cover at entrance level of nest (0-100%)                                                                                                 |
| <b>% Cov 5m</b>      | % Vegetation cover at 5 m height above nest (0-100%)                                                                                                  |
| <b>Canopy HT</b>     | Estimated height of top of tree canopy at box location                                                                                                |
| <b>% VIS</b>         | Estimated % visibility of nest entrance (0-100%)                                                                                                      |
| <b>Tree Species</b>  | Tree species on which box was mounted: eucalyptus (EUCA), valley oak (QULO), Fremont cottonwood (POFE), California black walnut (JUCA), willow (SALX) |
| <b>Std Type</b>      | Stand type – predominant tree species of stand where box mounted                                                                                      |
| <b>Std Size</b>      | Stand size – ordinal ranking from 1 (small; 1-5 trees) to 4 (continuous)                                                                              |

|                    |                                                                                     |
|--------------------|-------------------------------------------------------------------------------------|
| <b>Std Density</b> | Stand density – ordinal ranking from 1 (sparse, 1 tree/20m) to 4 (dense; 1 tree/5m) |
| <b>Tree 0m</b>     | Distance to nearest tree in front of box (0°)                                       |
| <b>Tree 90m</b>    | Distance to nearest tree to right of box (90°)                                      |
| <b>Tree 180m</b>   | Distance to nearest tree behind box (180°)                                          |
| <b>Tree 270m</b>   | Distance to nearest tree to left of box (270°)                                      |
| <b>SLP</b>         | Estimated slope from box to nearest water (°)                                       |
| <b>% Shcov</b>     | % vegetation cover along shore of nearest water                                     |
| <b>TREAT</b>       | Experimental treatment (control, down, eggs)                                        |

---

663

664

665



666 **Table 2** Sample sizes of experimental nests in each year. A number of nests were  
 667 used by other wildlife and so were excluded from analysis. Additionally, some boxes in  
 668 1999 had been used in the previous year by wood ducks (numbers in parentheses) and  
 669 so were also excluded from final analysis

| <b>Treatment</b>  | <b>Number Available</b> | <b>Used by Wood Ducks</b> | <b>Not Used by Wood Ducks</b> | <b>Used by Other Wildlife</b> |
|-------------------|-------------------------|---------------------------|-------------------------------|-------------------------------|
| <b>1998</b>       |                         |                           |                               |                               |
| Control           | 12                      | 1                         | 9                             | 2                             |
| Down              | 11                      | 3                         | 8                             | 0                             |
| Eggs              | 11                      | 1                         | 8                             | 2                             |
| <b>Total</b>      | <b>34</b>               | <b>5</b>                  | <b>25</b>                     | <b>4</b>                      |
| <b>1999</b>       |                         |                           |                               |                               |
| Control           | 15 (2)                  | 10 (1)                    | 2 (1)                         | 3                             |
| Down              | 11 (4)                  | 2 (3)                     | 4 (1)                         | 5                             |
| Eggs              | 13 (2)                  | 3 (2)                     | 5 (0)                         | 5                             |
| <b>Total</b>      | <b>39 (8)</b>           | <b>15 (6)</b>             | <b>11 (2)</b>                 | <b>12</b>                     |
| <b>Both Years</b> |                         |                           |                               |                               |
| Control           | 27 (2)                  | 11 (1)                    | 11 (1)                        | 5                             |
| Down              | 22 (4)                  | 5 (3)                     | 12 (1)                        | 5                             |
| Eggs              | 24 (2)                  | 4 (2)                     | 13 (0)                        | 7                             |
| <b>Total</b>      | <b>73 (8)</b>           | <b>20 (6)</b>             | <b>36 (2)</b>                 | <b>17</b>                     |

670 **Table 3** Generalized Linear Models (GLM) to examine the influence of nest box  
 671 treatment (control, down added, eggs added) and year (1998, 1999) on nest box use,  
 672 number of eggs laid, number of eggs hatching, and date of first egg laid for wood ducks  
 673 near Davis CA. Analyses were conducted for only the first nest attempts at each box  
 674 each year

| <b>Model</b>                                   | <b>N</b> | <b>-LLH<sup>a</sup></b> | <b>LR Chi Sq<sup>b</sup></b> | <b>DF<sup>c</sup></b> | <b>P<sup>d</sup></b> | <b>OD<sup>e</sup></b> |
|------------------------------------------------|----------|-------------------------|------------------------------|-----------------------|----------------------|-----------------------|
| <b>1. Use<sup>f</sup></b>                      |          |                         |                              |                       |                      |                       |
| Whole Model                                    | 56       | 6.63                    | 13.27                        | 3                     | 0.004                | 1.00                  |
| Treatment                                      |          |                         | 2.75                         | 2                     | 0.25                 |                       |
| Year                                           |          |                         | 9.95                         | 1                     | 0.02                 |                       |
| <b>2. Number of Eggs Laid<sup>g</sup></b>      |          |                         |                              |                       |                      |                       |
| Whole Model                                    | 20       | 1.57                    | 3.15                         | 3                     | 0.37                 | 0.56                  |
| Treatment                                      |          |                         | 0.94                         | 2                     | 0.61                 |                       |
| Year                                           |          |                         | 2.50                         | 1                     | 0.11                 |                       |
| <b>3. Number of Eggs Hatching<sup>g</sup></b>  |          |                         |                              |                       |                      |                       |
| Whole Model                                    | 20       | 3.11                    | 6.22                         | 3                     | 0.10                 | 1.17                  |
| Treatment                                      |          |                         | 6.17                         | 2                     | 0.05                 |                       |
| Year                                           |          |                         | 0.01                         | 1                     | 0.99                 |                       |
| <b>4. Julian Date of First Egg<sup>g</sup></b> |          |                         |                              |                       |                      |                       |
| Whole Model                                    | 20       | 10.79                   | 21.58                        | 3                     | 0.0001               | 3.34                  |
| Treatment                                      |          |                         | 0.02                         | 2                     | 0.99                 |                       |
| Year                                           |          |                         | 4.38                         | 1                     | <0.0001              |                       |

675

- 676 <sup>a</sup> –Log likelihood; difference of the log likelihoods of the full and reduced (intercept only) models
- 677 <sup>b</sup> Likelihood ratio Chi square
- 678 <sup>c</sup> Degrees of Freedom
- 679 <sup>d</sup> P value for Likelihood Chi square
- 680 <sup>e</sup> Overdispersion parameter (Pearson Chi square deviance / degrees of freedom of goodness of
- 681 fit test)
- 682 <sup>f</sup> Generalized Linear Model, Binomial distribution, Logit link function, corrected for
- 683 overdispersion
- 684 <sup>g</sup> Generalized Linear Model, Poisson distribution, Log link function, corrected for overdispersion
- 685
- 686

687 **Table 4** Generalized Linear Models (GLM) to examine the influence of Habitat  
 688 Variables and Treatment on nest box use, number of eggs laid, number of eggs  
 689 hatching, and date of first egg laid for wood ducks near Davis CA. Data for both years  
 690 are included in analyses. Models are ranked using AIC<sub>c</sub> Akaike Information Criterion.  
 691 Habitat variable abbreviation and description are in Table 1. TREAT: experimental nest  
 692 treatment (control, eggs, down)

| Model                                          | N  | - LLH <sup>a</sup> | LR Chi Sq <sup>b</sup> | DF <sup>c</sup> | P <sup>d</sup> | AIC <sub>c</sub> <sup>e</sup> | OD <sup>f</sup> |
|------------------------------------------------|----|--------------------|------------------------|-----------------|----------------|-------------------------------|-----------------|
| <b>1. Use<sup>g</sup></b>                      |    |                    |                        |                 |                |                               |                 |
| Tree 0m, % Vis                                 | 52 | 5.79               | 11.59                  | 2               | 0.003          | 64.35                         | 1.00            |
| Tree 0m, % Vis, Comp Dir                       | 52 | 6.54               | 13.09                  | 3               | 0.004          | 65.30                         | 1.00            |
| Tree 0m, % Vis, Comp Dir,<br>Dist Water        | 52 | 6.92               | 13.85                  | 4               | 0.008          | 67.11                         | 1.00            |
| Tree 0m, % Vis, TREAT                          | 52 | 6.45               | 12.91                  | 4               | 0.012          | 68.05                         | 1.00            |
| Tree 0m, % Vis, Comp Dir,<br>TREAT             | 52 | 7.26               | 14.53                  | 5               | 0.013          | 69.10                         | 1.00            |
| Tree 0m, % Vis, Comp Dir,<br>Dist Water, TREAT | 52 | 7.44               | 14.88                  | 6               | 0.021          | 71.56                         | 1.00            |
| <b>2. Number of Eggs Laid<sup>h</sup></b>      |    |                    |                        |                 |                |                               |                 |
| Dir Water, TREAT                               | 20 | 5.96               | 11.91                  | 4               | 0.018          | 247.48                        | 0.39            |
| Dir Water                                      | 20 | 5.79               | 11.58                  | 2               | 0.003          | 254.89                        | 0.37            |
| Dist Water, Dir Water                          | 20 | 13.43              | 26.85                  | 3               | 0.0001         | 365.33                        | 0.25            |
| Dist Water, Dir Water,<br>TREAT                | 20 | 17.59              | 35.18                  | 3               | 0.0001         | 420.96                        | 0.22            |

### 3. Number of Eggs Hatching<sup>h</sup>

|                            |    |       |       |   |        |        |      |
|----------------------------|----|-------|-------|---|--------|--------|------|
| Std Type                   | 20 | 3.37  | 6.74  | 3 | 0.08   | 98.60  | 1.22 |
| Dir Water                  | 20 | 1.05  | 2.10  | 2 | 0.35   | 98.91  | 0.35 |
| Dir Water, TREAT           | 20 | 3.92  | 7.84  | 4 | 0.097  | 102.11 | 1.21 |
| Dir Water, Std Type        | 20 | 4.95  | 9.90  | 5 | 0.08   | 106.65 | 1.19 |
| Std Type, TREAT            | 20 | 7.83  | 15.66 | 5 | 0.008  | 120.81 | 0.98 |
| Dir Water, Std Type, TREAT | 20 | 11.97 | 23.94 | 7 | 0.0012 | 139.12 | 0.87 |

### 4. Julian Date of First Egg<sup>h</sup>

|                     |    |      |      |   |       |       |      |
|---------------------|----|------|------|---|-------|-------|------|
| SLP                 | 19 | 2.05 | 4.09 | 1 | 0.043 | 45.94 | 5.79 |
| % Cov E             | 20 | 1.06 | 2.13 | 1 | 0.14  | 46.77 | 6.11 |
| % Cov E, SLP        | 19 | 2.76 | 5.53 | 2 | 0.063 | 49.42 | 5.57 |
| % Cov E, TREAT      | 20 | 1.66 | 3.31 | 3 | 0.35  | 50.56 | 6.39 |
| SLP, TREAT          | 19 | 3.51 | 7.02 | 3 | 0.071 | 52.62 | 5.45 |
| % Cov E, SLP, TREAT | 19 | 3.51 | 7.02 | 4 | 0.14  | 55.13 | 5.69 |

693

694 <sup>a</sup> -Log likelihood; difference of the log likelihoods of the full and reduced (intercept only) models

695 <sup>b</sup> Likelihood ratio Chi square

696 <sup>c</sup> Degrees of Freedom

697 <sup>d</sup> P value for Likelihood Chi square

698 <sup>e</sup> Akaike Information Criterion corrected for small sample sizes

699 <sup>f</sup> Overdispersion parameter (Pearson Chi square deviance / degrees of freedom of goodness of  
700 fit test)

701 <sup>g</sup> Generalized Linear Model, Binomial distribution, Logit link function, corrected for  
702       overdispersion

703 <sup>h</sup> Generalized Linear Model, Poisson distribution, Log link function, corrected for overdispersion

704

705 **Figures**

706

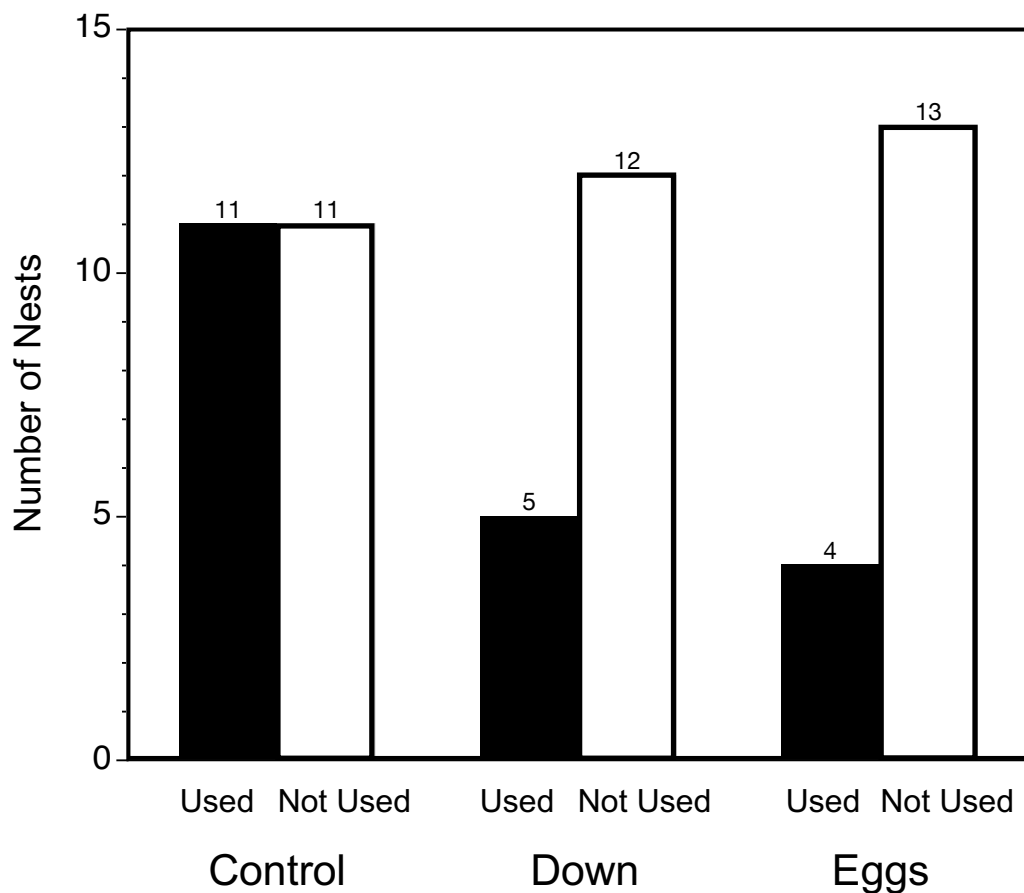

707

708 **Fig 1** Use of new nest boxes by wood ducks in California in response to internal visual  
709 social cues. New boxes contained down and eggs shells indicating a previously  
710 successful hatch (Down), eggs without down indicating current use (Eggs), or shavings  
711 indicating no current or previous use (Control). Used boxes are shown by solid black  
712 bars, unused boxes are shown by open bars, numbers above provide the number of  
713 nests in each category.

714

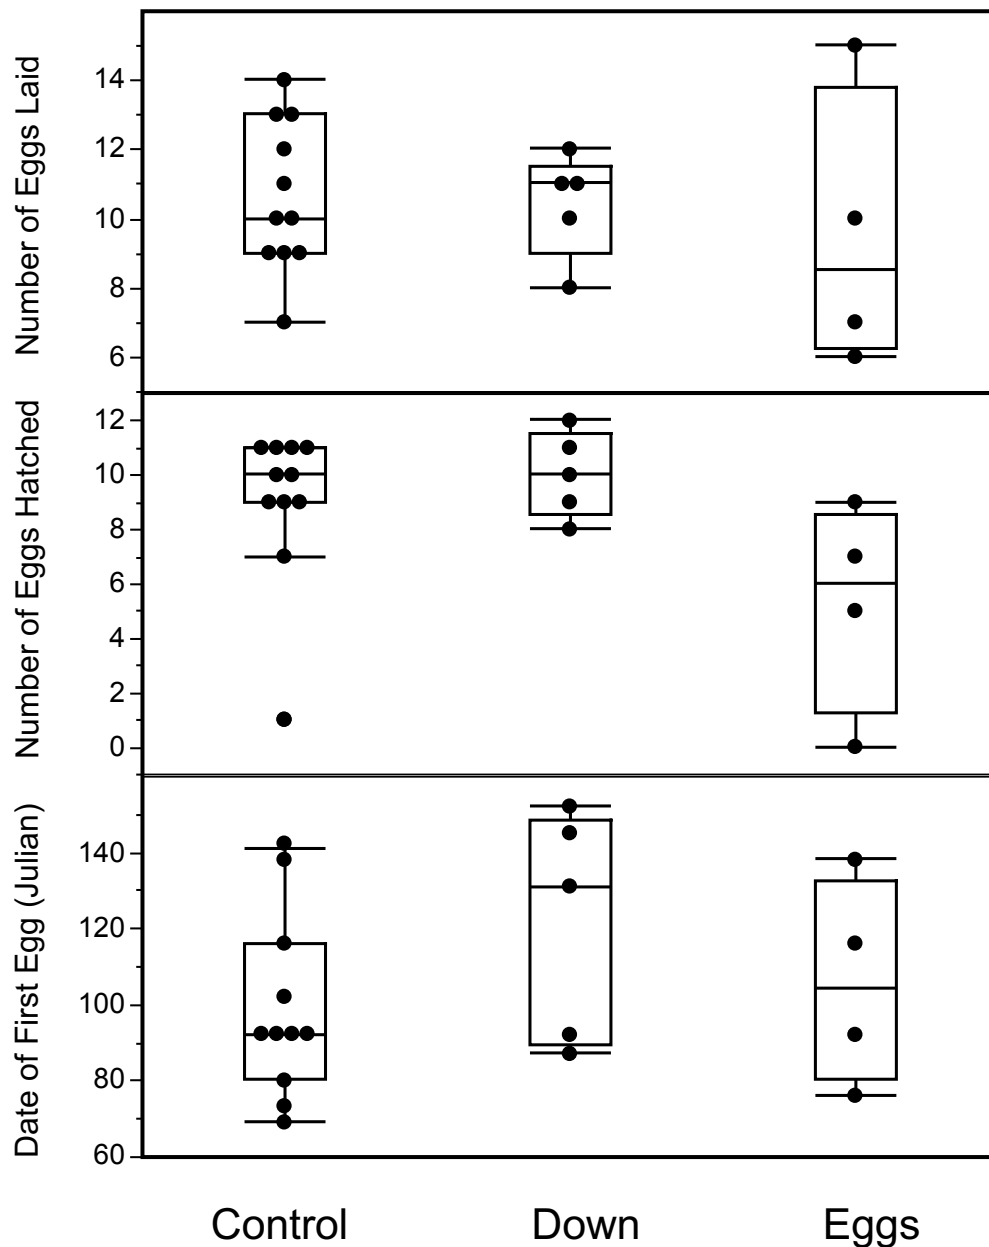

715

716 **Fig 2** Measures of reproductive success in the three nest box treatment groups

717 (Control, Down and Eggs). Solid points are values for individual nests with box plots

718 showing the median, 25<sup>th</sup> and 75<sup>th</sup> quantiles (box), and range excluding outliers (vertical

719 line). Top: Number of eggs laid in each nest, Middle: Number of eggs that hatched in

720 each nest, and Bottom: Julian date of first egg laid in each nest.



721 **References**

- 722 Ahlering MA, Arlt D, Betts MG, Fletcher RJ, Nocera JJ, Ward MP (2010) Research  
723 needs and recommendations for the use of conspecific-attraction methods in the  
724 conservation of migratory songbirds. *Condor* 112:252-264  
725 doi:10.1525/cond.2010.090239
- 726 Ahlering MA, Faaborg J (2006) Avian habitat management meets conspecific attraction:  
727 if you build it, will they come? *Auk* 123:301-312
- 728 Andersson M (1984) Brood parasitism within species. In: Barnard CJ (ed) *Producers*  
729 *and Scroungers: Strategies of Exploitation and Parasitism*. Croom Helm, London,  
730 pp 195-228
- 731 Andrews JE, Brawn JD, Ward MP (2015) When to use social cues: conspecific  
732 attraction at newly created grasslands. *Condor* 117:297-305  
733 doi:10.1650/CONDOR-14-172.1
- 734 Aparicio JM, Bonal R, Muñoz A (2007) Experimental test on public information use in  
735 the colonial Lesser Kestrel. *Evol Ecol* 21:783-800  
736 doi:<http://dx.doi.org/10.1007/s10682-006-9151-7>
- 737 Avarguès-Weber A, Lachlan R, Chittka L (2018) Bumblebee social learning can lead to  
738 suboptimal foraging choices. *Anim Behav* 135:209-214  
739 doi:<https://doi.org/10.1016/j.anbehav.2017.11.022>
- 740 Bellrose FC, Holm DJ (1994) *Ecology and Management of the Wood Duck*. Stackpole  
741 Books, Mechanicsburg, PA
- 742 Betts MG, Hadley AS, Rodenhouse N, Nocera JJ (2008) Social information trumps  
743 vegetation structure in breeding-site selection by a migrant songbird. *Proc R Soc*  
744 *B* 275:2257-2263 doi:10.1098/rspb.2008.0217
- 745 Bonnie KE, Earley RL (2007) Expanding the scope for social information use. *Anim*  
746 *Behav* 74:171-181 doi:<https://doi.org/10.1016/j.anbehav.2006.12.009>
- 747 Boulinier T, McCoy KD, Yoccoz NG, Gasparini J, Tveraa T (2008) Public information  
748 affects breeding dispersal in a colonial bird: kittiwakes cue on neighbours. *Biol*  
749 *Lett* 4:538-540 doi:10.1098/rsbl.2008.0291

- 750 Brockmann JH (1993) Parasitizing conspecifics: Comparisons between hymenoptera  
751 and birds. *Trends Ecol Evol* 8:2-4 doi:[https://doi.org/10.1016/0169-](https://doi.org/10.1016/0169-5347(93)90120-E)  
752 [5347\(93\)90120-E](https://doi.org/10.1016/0169-5347(93)90120-E)
- 753 Brown CR (1984) Laying eggs in a neighbor's nest: Benefit and cost of colonial nesting  
754 in swallows. *Science* 224:518-519
- 755 Brown CR, Brown MB (1996) Coloniality in the cliff swallow: the effect of group size on  
756 social behavior. University of Chicago Press, Chicago, IL
- 757 Burnham KP, Anderson DR (2002) Model selection and multimodel inference: a  
758 practical information-theoretic approach. Springer, New York
- 759 Campobello D, Sealy SG (2011) Use of social over personal information enhances nest  
760 defense against avian brood parasitism. *Behav Ecol* 22:422-428  
761 doi:10.1093/beheco/arq225
- 762 Chalfoun AD, Schmidt KA (2012) Adaptive breeding-habitat selection: is it for the birds?  
763 *Auk* 129:589-599 doi:10.1525/auk.2012.129.4.589
- 764 Clark R, Shutler D (1999) Avian habitat selection: pattern from process in nest-site use  
765 by ducks? *Ecology* 80:272-287 doi:10.1890/0012-  
766 9658(1999)080[0272:AHSPFP]2.0.CO2
- 767 Clawson RL, Hartman GW, Fredrickson LH (1979) Dump nesting in a Missouri wood  
768 duck population. *Journal Wildl Manage* 43:347-355 doi:10.2307/3800343
- 769 Coolen I, Bergen YV, Day RL, Laland KN (2003) Species difference in adaptive use of  
770 public information in sticklebacks. *Proc R Soc B* 270:2413-2419  
771 doi:10.1098/rspb.2003.2525
- 772 Coulton D, Clark R, Wassenaar L, Howerter D, Anderson M (2011) Social and habitat  
773 correlates of immigrant recruitment of yearling female Mallards to breeding  
774 locations. *J Ornithol* 152:781-791 doi:10.1007/s10336-011-0660-y
- 775 Crabtree RL, Broome LS, Wolfe ML (1989) Effects of habitat characteristics on gadwall  
776 nest predation and nest-site selection. *J Wildl Manage* 53:129-137  
777 doi:10.2307/3801319
- 778 Dall SRX, Giraldeau L-A, Olsson O, McNamara JM, Stephens DW (2005) Information  
779 and its use by animals in evolutionary ecology. *Trends Ecol Evol* 20:187-193  
780 doi:<https://doi.org/10.1016/j.tree.2005.01.010>

- 781 Danchin E, Boulinier T, Massot M (1998) Conspecific reproductive success and  
782 breeding habitat selection: implications for the study of coloniality. *Ecology*  
783 79:2415-2428
- 784 Danchin É, Luc-Alain G, Valone TJ, Wagner RH (2004) Public information: from nosy  
785 neighbors to cultural evolution. *Science* 305:487-491
- 786 Davies NB, Brooke MdL (1988) Cuckoos versus reed warblers: adaptations and  
787 counteradaptations. *Anim Behav* 36:262-284 doi:[https://doi.org/10.1016/S0003-](https://doi.org/10.1016/S0003-3472(88)80269-0)  
788 [3472\(88\)80269-0](https://doi.org/10.1016/S0003-3472(88)80269-0)
- 789 Dixon J (1924) Nesting of the Wood Duck in California. *Condor* 26:41-66  
790 doi:10.2307/1363040
- 791 Doligez B, Danchin E, Clobert J (2002) Public information and breeding habitat  
792 selection in a wild bird population. *Science* 297:1168-1170
- 793 Dow H, Fredga S (1985) Selection of nest sites by a hole-nesting duck, the Goldeneye  
794 *Bucephala clangula*. *Ibis* 127:16-30 doi:10.1111/j.1474-919X.1985.tb05034.x
- 795 Dubois F, Drullion D, Witte K (2012) Social information use may lead to maladaptive  
796 decisions: a game theoretic model. *Behav Ecol* 23:225-231  
797 doi:10.1093/beheco/arr179
- 798 Dyson ME, Slattery SM, Fedy BC (2019) Microhabitat nest-site selection by ducks in the  
799 boreal forest. *J Field Ornithol* 90:348-360 doi:10.1111/jofo.12314
- 800 Eadie J, Gauthier G (1985) Prospecting for nest sites by cavity-nesting ducks of the  
801 genus *Bucephala*. *Condor* 87:528-534 doi:10.2307/1367952
- 802 Eadie JM, Kehoe FP, Nudds TD (1988) Pre-hatch and post-hatch brood amalgamation  
803 in North American Anatidae: a review of hypotheses. *Can J Zool* 66:1709-1721
- 804 Eadie JM, Mallory ML, Lumsden HG (1995) Common Goldeneye: *Bucephala clangula*.  
805 In: Poole A, Gill F (eds) *The birds of North America*, vol 170. American  
806 Ornithologists' Union, Washington, D.C.,
- 807 Eadie JM, Smith JNM, Zadworny D, Kühnlein U, Cheng K (2010) Probing parentage in  
808 parasitic birds: an evaluation of methods to detect conspecific brood parasitism  
809 using goldeneyes *Bucephala islandica* and *B. clangula* as a test case. *J Avian*  
810 *Biol* 41:163-176 doi:10.1111/j.1600-048X.2009.04735.x

- 811 Eichholz MW, Elmberg J (2014) Nest site selection by Holarctic waterfowl: a multi-level  
812 review. *Wildfowl* 4:86-130
- 813 Ellard CG, Byers RD (2005) The influence of the behaviour of conspecifics on  
814 responses to threat in the Mongolian gerbil, *Meriones unguiculatus*. *Anim Behav*  
815 70:49-58 doi:<https://doi.org/10.1016/j.anbehav.2004.08.023>
- 816 Elvidge CK, Cooke ELL, Cunjak RA, Cooke SJ (2016) Social cues may advertise  
817 habitat quality to refuge-seeking conspecifics. *Can J Zool* 95:1-5 doi:10.1139/cjz-  
818 2016-0144
- 819 Evans JC, Votier SC, Dall SRX (2016) Information use in colonial living. *Biol Rev*  
820 91:658-672 doi:10.1111/brv.12188
- 821 Fast PLF, Gilchrist HG, Clark RG (2010) Nest-site materials affect nest-bowl use by  
822 Common Eiders (*Somateria mollissima*). *Can J Zool* 88:214-218  
823 doi:10.1139/Z09-131
- 824 Firth D (1993) Bias reduction of maximum likelihood estimates. *Biometrika* 80:27-38  
825 doi:10.2307/2336755
- 826 Frechette JL, Sieving KE, Boinski S (2014) Social and personal information use by  
827 squirrel monkeys in assessing predation risk. *Am J Primatol* 76:956-966  
828 doi:10.1002/ajp.22283
- 829 Gibbons DW (1986) Brood parasitism and cooperative nesting in the moorhen, *Gallinula*  
830 *chloropus*. *Behav Ecol Sociobiol* 19:221-232
- 831 Gil MA, Baskett ML, Schreiber SJ (2019) Social information drives ecological outcomes  
832 among competing species. *Ecology* 100 doi:<http://dx.doi.org/10.1002/ecy.2835>
- 833 Gilmer DS, Ball IJ, Cowardin LM, Mathisen JE, Riechmann JH (1978) Natural cavities  
834 used by wood ducks in north-central Minnesota. *J Wildl Manag* 42:288-298
- 835 Gloutney M, Clark R (1997) Nest-site selection by mallards and blue-winged teal in  
836 relation to microclimate. *Auk* 114:381-395 doi:10.2307/4089240
- 837 Griffin AS (2004) Social learning about predators: a review and prospectus. *Anim Learn*  
838 *Behav* 32:131-140 doi:10.3758/BF03196014
- 839 Grüter C, Leadbeater E (2014) Insights from insects about adaptive social information  
840 use. *Trends Ecol Evol* 29:177-184 doi:<https://doi.org/10.1016/j.tree.2014.01.004>

- 841 Hepp GR, Bellrose FC (1995) Wood Duck (*Aix sponsa*). In: Poole A, Gill F (eds) The  
842 Birds of North America, vol 169. American Ornithologists' Union and Academy of  
843 Natural Sciences of Philadelphia, Washington, D.C. doi:10.2173/bna.169
- 844 Hepp GR, Kennamer RA (1992) Characteristics and consequences of nest-site fidelity  
845 in Wood Ducks. *Auk* 109:812-818 doi:10.2307/4088155
- 846 Heusmann HW, Bellville R, Burrell RG (1980) Further observations on dump nesting by  
847 wood ducks. *J Wildl Manage* 44:908-915 doi:10.2307/3808323
- 848 Hines JE, Mitchell GJ (1983) Gadwall nest-site selection and nesting success. *J Wildl*  
849 *Manage* 47:1063-1071 doi:10.2307/3808165
- 850 Hobel G, Christie A (2016) Do green treefrogs use social information to orient outside  
851 the breeding season? *Zool Stud* 55:17 doi:10.6620/zs.2016.55-17
- 852 Jansen RW, Bollinger EK (1998) Effects of nest-box visibility and clustering on Wood  
853 Duck brood parasitism in Illinois. *Trans Ill State Acad Sci* 91:161-166
- 854 JMP (2018), 14 edn. SAS Institute, Inc., Cary, NC
- 855 Jones J (2001) Habitat selection studies in avian ecology: a critical review. *Auk*  
856 118:557-562 doi:10.1093/auk/118.2.557
- 857 Kar F, Whiting MJ, Noble DWA (2017) Dominance and social information use in a lizard.  
858 *Anim Cogn* 20:805-812 doi:10.1007/s10071-017-1101-y
- 859 Kearns L, Rodewald A (2013) Within-season use of public and private information on  
860 predation risk in nest-site selection. *J Ornithol* 154:163-172 doi:10.1007/s10336-  
861 012-0882-7
- 862 Kelly JK, Schmidt KA (2017) Fledgling calls are a source of social information for  
863 conspecific, but not heterospecific, songbird territory selection. *Ecosphere* 8:n/a-  
864 n/a doi:10.1002/ecs2.1512
- 865 Langmore N, Cockburn A, Russell A, Kilner R (2009) Flexible cuckoo chick-rejection  
866 rules in the superb fairy-wren. *Behav Ecol* 20:978-984  
867 doi:10.1093/beheco/arp086
- 868 Lee AEG, Ounsley JP, Coulson T, Rowcliffe JM, Cowlshaw G (2016) Information use  
869 and resource competition: an integrative framework. *Proc R Soc B* 283:20152550  
870 doi:10.1098/rspb.2015.2550

- 871 Lewanzik D, Sundaramurthy AK, Goerlitz HR (2019) Insectivorous bats integrate social  
872 information about species identity, conspecific activity and prey abundance to  
873 estimate cost–benefit ratio of interactions. *J Anim Ecol* 88:1462-1473  
874 doi:10.1111/1365-2656.12989
- 875 Lusignan AP, Mehl KR, Jones IL, Gloutney ML (2010) Conspecific brood parasitism in  
876 Common Eiders (*Somateria mollissima*): Do brood parasites target safe nest  
877 sites? *Auk* 127:765-772 doi:10.1525/auk.2010.09207
- 878 Lyon BE, Eadie JM (2008) Conspecific brood parasitism in birds: a life-history  
879 perspective. *Annu Rev Ecol Evol Syst* 39:343-363
- 880 Lyon BE, Eadie JM (2017) Why *do* birds lay eggs in conspecifics' nests? In: Soler M (ed)  
881 Avian Brood Parasitism. Springer International Publishing,
- 882 Machovsky-Capuska GE, Hauber ME, Libby E, Amiot C, Raubenheimer D (2014) The  
883 contribution of private and public information in foraging by Australasian gannets.  
884 *Anim Cogn* 17:849-858 doi:10.1007/s10071-013-0716-x
- 885 MacWhirter RB (1989) On the rarity of intraspecific brood parasitism. *Condor* 91:485-  
886 492
- 887 Moksnes A, Roeskaft E, Korsnes L (1993) Rejection of cuckoo (*Cuculus canorus*) eggs  
888 by meadow pipits (*Anthus pratensis*). *Behav Ecol* 4:120-127  
889 doi:10.1093/beheco/4.2.120
- 890 Mönkkönen M, Forsman JT (2002) Heterospecific attraction among forest birds: a  
891 review. *Ornithol Sci* 1:41-51 doi:10.2326/osj.1.41
- 892 Nocera JJ, Betts MG (2010) The role of social information in avian habitat selection.  
893 *Condor* 112:222-224 doi:10.1525/cond.2010.100005
- 894 Nordell SE, Valone TJ (1998) Mate choice copying as public information. *Ecol Lett* 1:74-  
895 76 doi:10.1046/j.1461-0248.1998.00025.x
- 896 O'Neil ST, Warren JM, Takekawa JY, De La Cruz SEW, Cutting KA, Parker MW, Yee JL  
897 (2014) Behavioural cues surpass habitat factors in explaining prebreeding  
898 resource selection by a migratory diving duck. *Anim Behav* 90:21-29  
899 doi:10.1016/j.anbehav.2014.01.004
- 900 Odell NS, Eadie JM (2010) Do wood ducks use the quantity of eggs in a nest as a cue  
901 to the nest's value? *Behav Ecol* 21:794-801 doi:10.1093/beheco/arq055



- 902 Orians GH, Wittenberger JF (1991) Spatial and temporal scales in habitat selection. *Am*  
903 *Nat* 137:S29-S49
- 904 Parejo D, Avilés JM (2007) Do avian brood parasites eavesdrop on heterospecific  
905 sexual signals revealing host quality? A review of the evidence. *Anim Cogn*  
906 10:81-88 doi:10.1007/s10071-006-0055-2
- 907 Parejo D, Pérez-Contreras T, Navarro C, Soler JJ, Avilés JM (2008) Spotless starlings  
908 rely on public information while visiting conspecific nests: an experiment. *Anim*  
909 *Behav* 75:483-488 doi:10.1016/j.anbehav.2007.05.012
- 910 Pöysä H (1999) Conspecific nest parasitism is associated with inequality in nest  
911 predation risk in the common goldeneye (*Bucephala clangula*). *Behav Ecol*  
912 10:533-540 doi:10.1093/beheco/10.5.533
- 913 Pöysä H (2006) Public information and conspecific nest parasitism in goldeneyes:  
914 targeting safe nests by parasites. *Behav Ecol* 17:459-465  
915 doi:10.1093/beheco/arj049
- 916 Pöysä H, Elmberg J, Sjöberg K, Nummi P (1998) Habitat selection rules in breeding  
917 mallards (*Anas platyrhynchos*): a test of two competing hypotheses. *Oecologia*  
918 114:283-287 doi:10.1007/s004420050447
- 919 Pöysä H, Lindblom K, Rutila J, Sorjonen J (2010) Response of parasitically laying  
920 goldeneyes to experimental nest predation. *Anim Behav* 80:881-886  
921 doi:10.1016/j.anbehav.2010.08.009
- 922 Pöysä H, Paasivaara A (2015) Nest predation risk, but not demography, drives  
923 dynamics of conspecific brood parasitism. *Behav Ecol* 27:196-203  
924 doi:10.1093/beheco/arv139
- 925 Pöysä H, Paasivaara A, Lindblom K, Rutila J, Sorjonen J (2014) Co-parasites  
926 preferentially lay with kin and in safe neighbourhoods: experimental evidence  
927 from goldeneye ducks. *Anim Behav* 91:111-118  
928 doi:10.1016/j.anbehav.2014.03.015
- 929 Rieucou G, Giraldeau L-A (2011) Exploring the costs and benefits of social information  
930 use: an appraisal of current experimental evidence. *Phil Trans Roy Soc B*  
931 366:949-957 doi:doi:10.1098/rstb.2010.0325

- 932 Rohwer FC, Freeman S (1989) The distribution of conspecific nest parasitism in birds.  
933 *Can J Zool* 67:239-253
- 934 Roy C, Eadie JM, Schauber EM, Odell NS, Berg EC, Moore T (2009) Public information  
935 and conspecific nest parasitism in wood ducks: does nest density influence  
936 quality of information? *Anim Behav* 77:1367-1373  
937 doi:[10.1016/j.anbehav.2009.02.017](https://doi.org/10.1016/j.anbehav.2009.02.017)
- 938 Roy-Nielsen CL, Gates RJ, Parker PG (2006) Intraspecific nest parasitism of wood  
939 ducks in natural cavities: comparisons with nest boxes. *J Wildl Manag* 70:835-  
940 843
- 941 Samplonius JM, Van Der Meer IMK, Both C (2017) Nest site preference depends on the  
942 relative density of conspecifics and heterospecifics in wild birds. *Front Zool* 14  
943 doi:[10.1186/s12983-017-0246-5](https://doi.org/10.1186/s12983-017-0246-5)
- 944 Schlaepfer MA, Runge MC, Sherman PW (2002) Ecological and evolutionary traps.  
945 *Trends Ecol Evol* 17:474-480 doi:[https://doi.org/10.1016/S0169-5347\(02\)02580-6](https://doi.org/10.1016/S0169-5347(02)02580-6)
- 946 Schmidt KA, Whelan CJ (2010) Nesting in an uncertain world: information and sampling  
947 the future. *Oikos* 119:245-253 doi:[10.1111/j.1600-0706.2009.17824.x](https://doi.org/10.1111/j.1600-0706.2009.17824.x)
- 948 Semel B, Sherman PW (1986) Dynamics of nest parasitism in Wood Ducks. *Auk*  
949 103:813-816
- 950 Semel B, Sherman PW (1995) Alternative placement strategies for Wood Duck nest  
951 boxes. *Wildl Soc Bull* (1973-2006) 23:463-471
- 952 Semel B, Sherman PW, Byers SM (1988) Effects of brood parasitism and nest-box  
953 placement on Wood Duck breeding ecology. *Condor* 90:920-930
- 954 Seppänen J-T, Forsman JT (2007) Interspecific social learning: novel preference can be  
955 acquired from a competing species. *Curr Biol* 17:1248-1252  
956 doi:<https://doi.org/10.1016/j.cub.2007.06.034>
- 957 Seppänen J-T, Forsman JT, Mönkkönen M, Thomson RL (2007) Social information use  
958 is a process across time, space, and ecology, reaching heterospecifics. *Ecology*  
959 88:1622-1633 doi:[10.1890/06-1757.1](https://doi.org/10.1890/06-1757.1)
- 960 Sergio F, Penteriani V (2005) Public information and territory establishment in a loosely  
961 colonia raptor. *Ecology* 86:340-346 doi:[10.1890/04-0137](https://doi.org/10.1890/04-0137)



- 962 Soler M (ed) (2017) Avian Brood Parasitism: Behaviour, Ecology, Evolution and  
963 Coevolution. Springer International Publishing. doi:10.1007/978-3-319-73138-4
- 964 Soulliere GJ (1988) Density of suitable wood duck nest cavities in a northern hardwood  
965 forest. *J Wildl Manag*:86-89
- 966 Szymkowiak J (2013) Facing uncertainty: how small songbirds acquire and use social  
967 information in habitat selection process? *Springer Sci Rev* 1:115-131  
968 doi:10.1007/s40362-013-0012-9
- 969 Templeton JJ, Giraldeau L-A (1996) Vicarious sampling: the use of personal and public  
970 information by starlings foraging in a simple patchy environment. *Behav Ecol*  
971 *Sociobiol* 38:105-114 doi:10.1007/s002650050223
- 972 Thimot NJ, Titman RD, Elliott KH, Craik SR (2020) Conspecific brood parasitism in an  
973 upland-nesting bird: cues parasites use to select a nest. *Behav Ecol Sociobiol*  
974 74:27 doi:10.1007/s00265-020-2808-3
- 975 Toelch U, Bruce MJ, Newson L, Richerson PJ, Reader SM (2014) Individual  
976 consistency and flexibility in human social information use. *Proc R Soc B*  
977 281:20132864 doi:10.1098/rspb.2013.2864
- 978 Tolvanen J, Seppanen JT, Monkkonen M, Thomson RL, Ylonen H, Forsman JT (2018)  
979 Interspecific information on predation risk affects nest site choice in a passerine  
980 bird. *BMC Evol Biol* 18 doi:10.1186/s12862-018-1301-3
- 981 Vaclav R, Valera F, Martinez T (2011) Social information in nest colonisation and  
982 occupancy in a long-lived, solitary breeding bird. *Oecologia* 165:617-627  
983 doi:10.1007/s00442-010-1848-1
- 984 Valone TJ (1989) Group foraging, public information, and patch estimation. *Oikos*  
985 56:357-363 doi:10.2307/3565621
- 986 Valone TJ (2007) From eavesdropping on performance to copying the behavior of  
987 others: a review of public information use. *Behav Ecol Sociobiol* 62:1-14  
988 doi:<http://dx.doi.org/10.1007/s00265-007-0439-6>
- 989 Ward M (2005) Habitat selection by dispersing yellow-headed blackbirds: evidence of  
990 prospecting and the use of public information. *Oecologia* 145:650-657  
991 doi:10.1007/s00442-005-0179-0

- 992 Ward MP, Benson TJ, Semel B, Herkert JR (2010) The use of social cues in habitat  
993 selection by wetland birds. *Condor* 112:245-251 doi:10.1525/cond.2010.090238
- 994 Webster MM, Laland KN (2017) Social information use and social learning in non-  
995 grouping fishes. *Behav Ecol* 28:1547-1552 doi:10.1093/beheco/arx121
- 996 Wilson SF (1993) Use of wood duck decoys in a study of brood parasitism. *J Field*  
997 *Ornithol* 64:337-340
- 998 Yom-Tov Y (1980) Intraspecific nest parasitism in birds. *Biol Rev Camb Philos Soc*  
999 55:93-108
- 1000 Zink AG (2000) The evolution of intraspecific brood parasitism in birds and insects. *Am*  
1001 *Nat* 155:395-405
- 1002
